# Supplementary material
Source: MDPI journal article supplement (https://www.mdpi.com/2075-163X/14/1/81)
Supplement: s1 [file s1]

Supplementary Table S2.  $^{40}\text{Ar}/^{39}\text{Ar}$  step-heating data for biotite sample 8130, Steel Mountain.

| Step | Laser Power<br>(Watts) | Ca/K   | Cl/K  | % $^{40}\text{Ar}$ atm | % $^{39}\text{Ar}$ | $^{40}\text{Ar}^*/^{39}\text{ArK}$ | Age             |
|------|------------------------|--------|-------|------------------------|--------------------|------------------------------------|-----------------|
| 1    | 0.50                   | 1.611  | 0.052 | 18.05                  | 6.37               | 21.843 +/- 0.717                   | 290.59 +/- 8.81 |
| 2    | 1.25                   | 1.506  | 0.035 | 6.91                   | 19.79              | 32.884 +/- 0.284                   | 421.38 +/- 3.25 |
| 3    | 1.75                   | 3.379  | 0.028 | 4.73                   | 31.25              | 37.285 +/- 0.299                   | 470.99 +/- 3.32 |
| 4    | 2.00                   | 0.951  | 0.022 | 2.17                   | 13.90              | 38.754 +/- 0.393                   | 487.25 +/- 4.33 |
| 5    | 2.25                   | 1.294  | 0.022 | 2.07                   | 7.88               | 38.710 +/- 0.665                   | 486.77 +/- 7.33 |
| 6    | 2.75                   | 3.612  | 0.023 | 3.64                   | 6.04               | 38.006 +/- 0.779                   | 478.99 +/- 8.62 |
| 7    | 3.50                   | 3.884  | 0.027 | 4.17                   | 6.75               | 38.869 +/- 0.704                   | 488.52 +/- 7.75 |
| 8    | 7.00                   | 12.078 | 0.051 | 6.28                   | 8.01               | 65.254 +/- 0.738                   | 757.88 +/- 7.00 |

alt 9
