# Supplementary material
Source: MDPI journal article supplement (https://www.mdpi.com/2075-163X/14/1/81)
Supplement: s1 [file s1]

Supplementary Figure S1: (SEM)-BSE images and EDS mineral analyses for sample 8174.

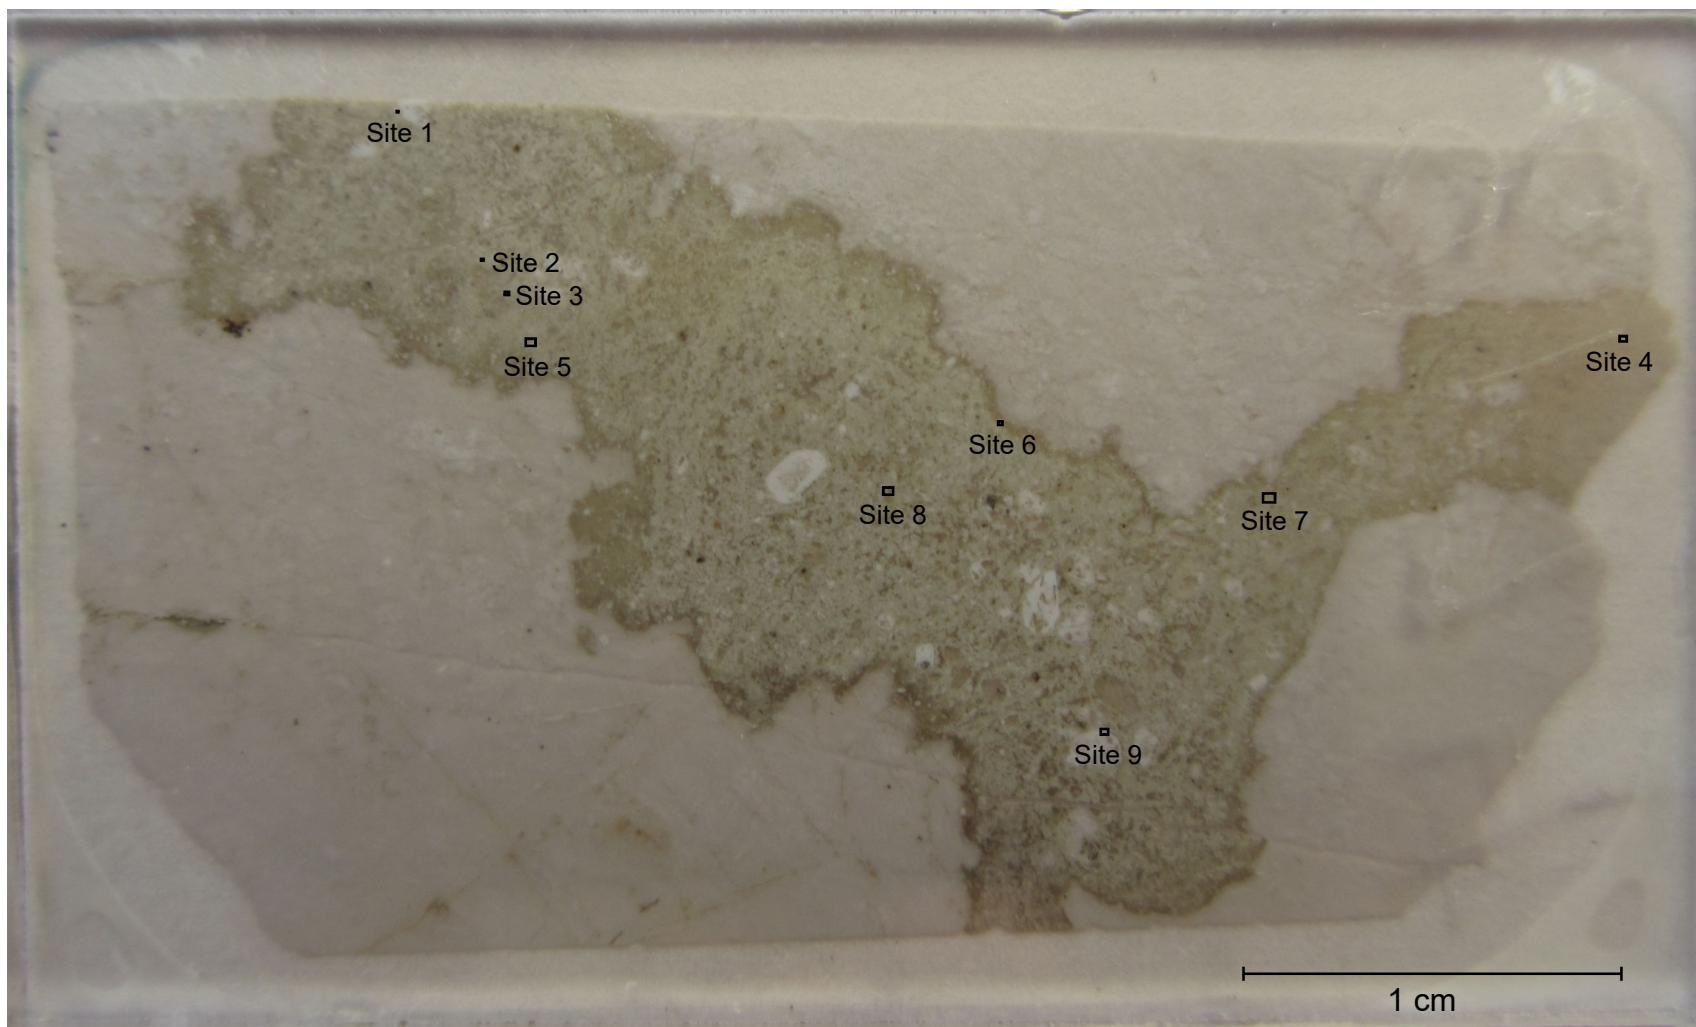

Figure S-1.1: Sample 8174. Scanned thin section showing the location of analysed sites.

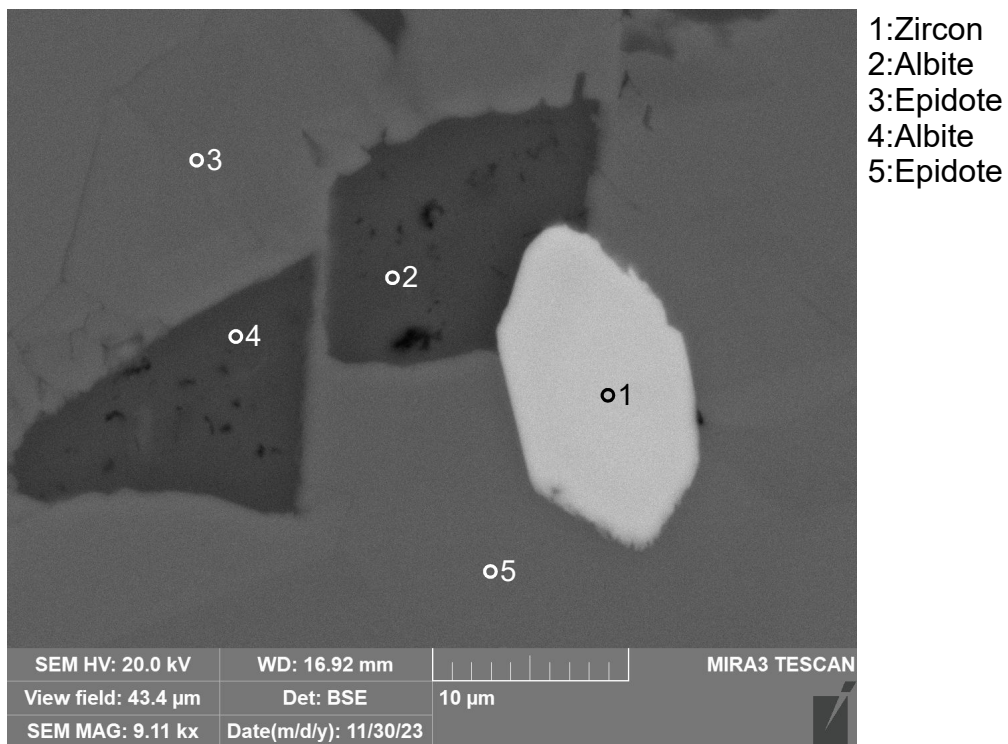

Figure S-1.2: Sample 8174 (SEM) site 1.

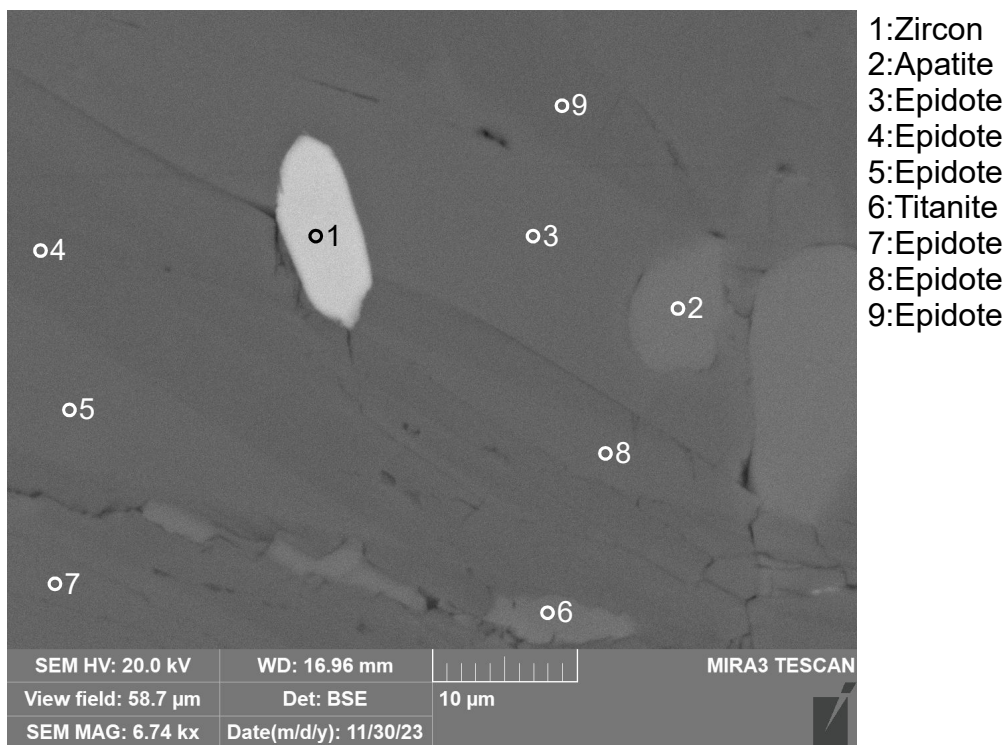

Figure S-1.3: Sample 8174 (SEM) site 2.



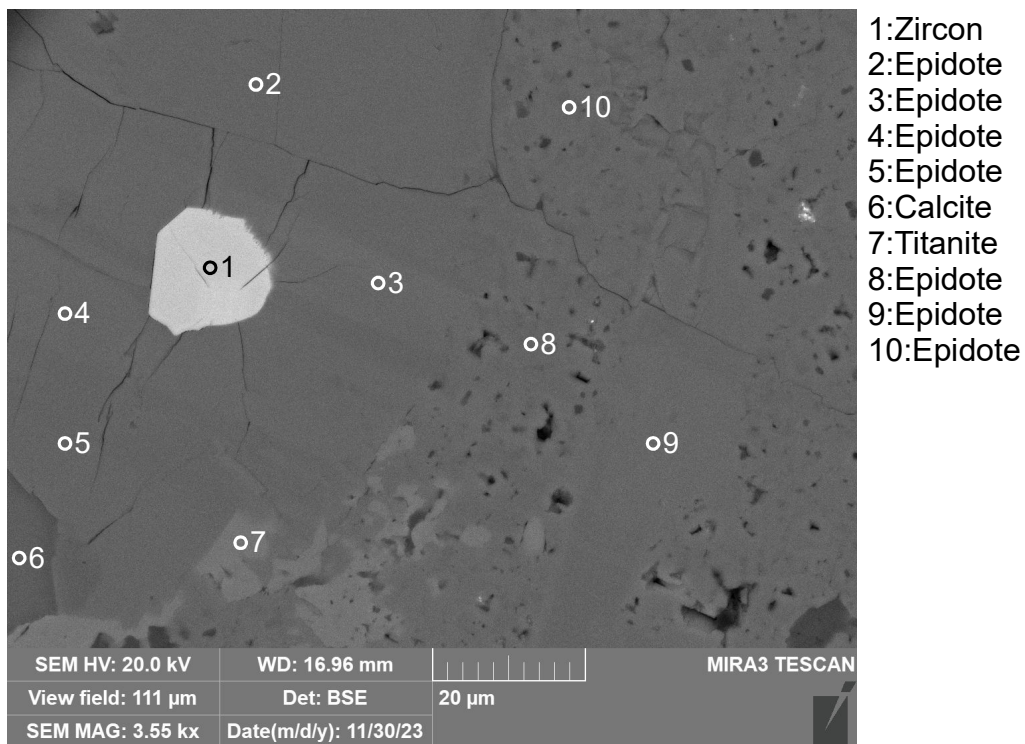

Figure S-1.4: Sample 8174 (SEM) site 3.

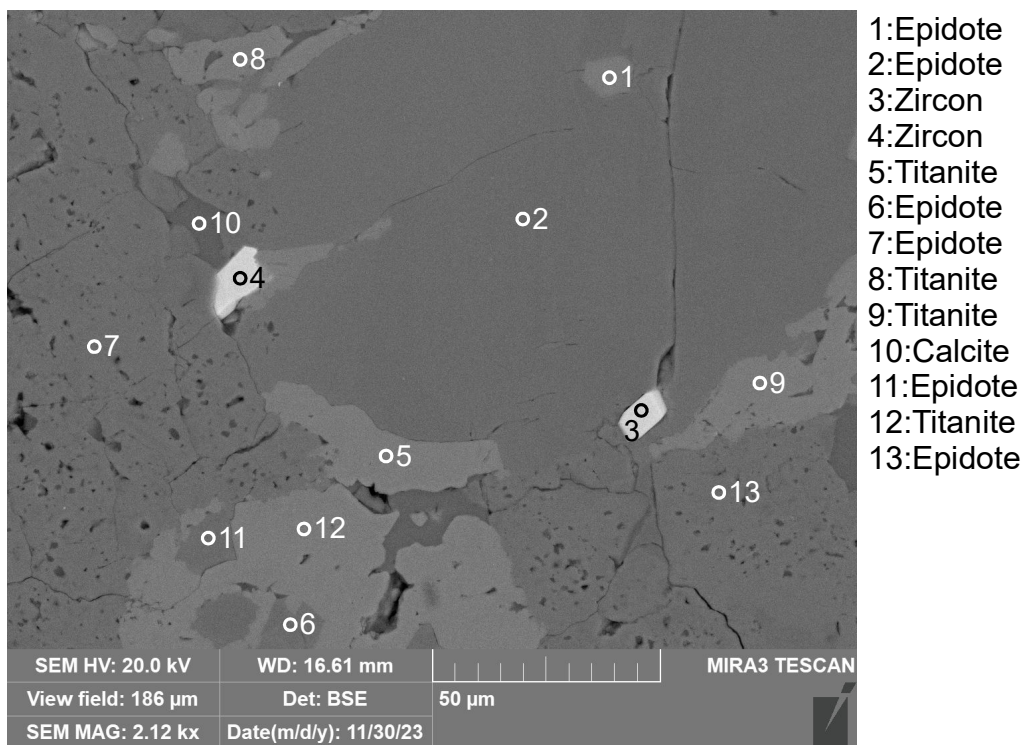

Figure S-1.5: Sample 8174 (SEM) site 4.

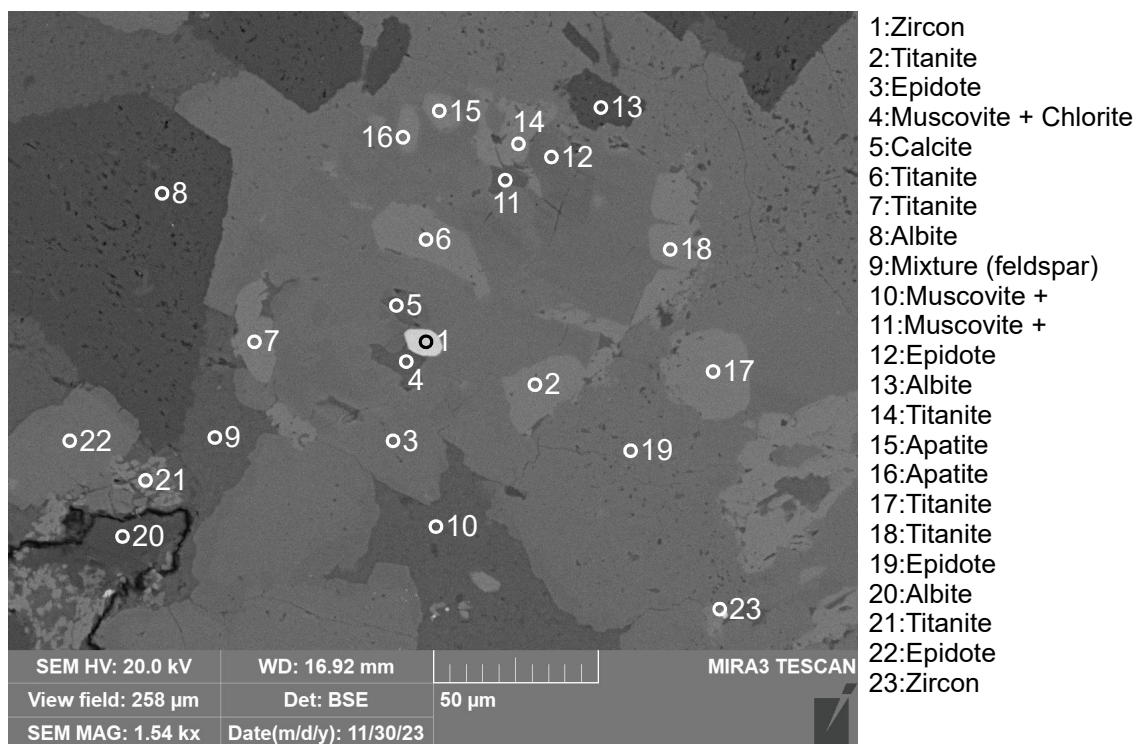

Figure S-1.6: Sample 8174 (SEM) site 5.

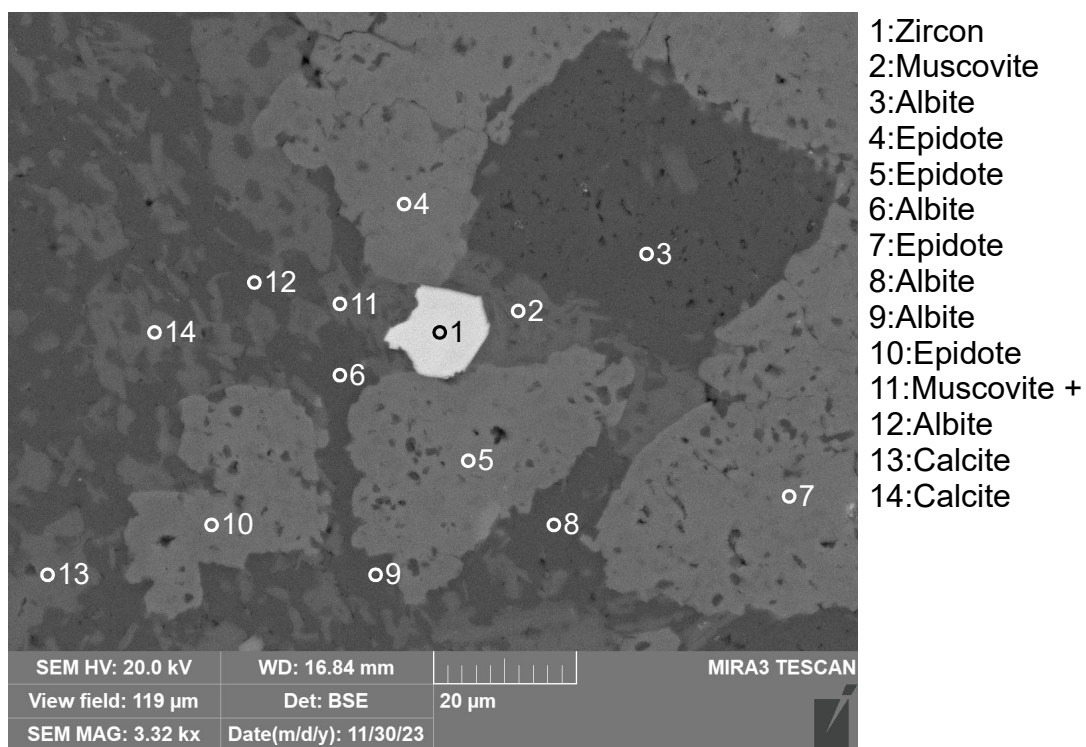

Figure S-1.7: Sample 8174 (SEM) site 6.



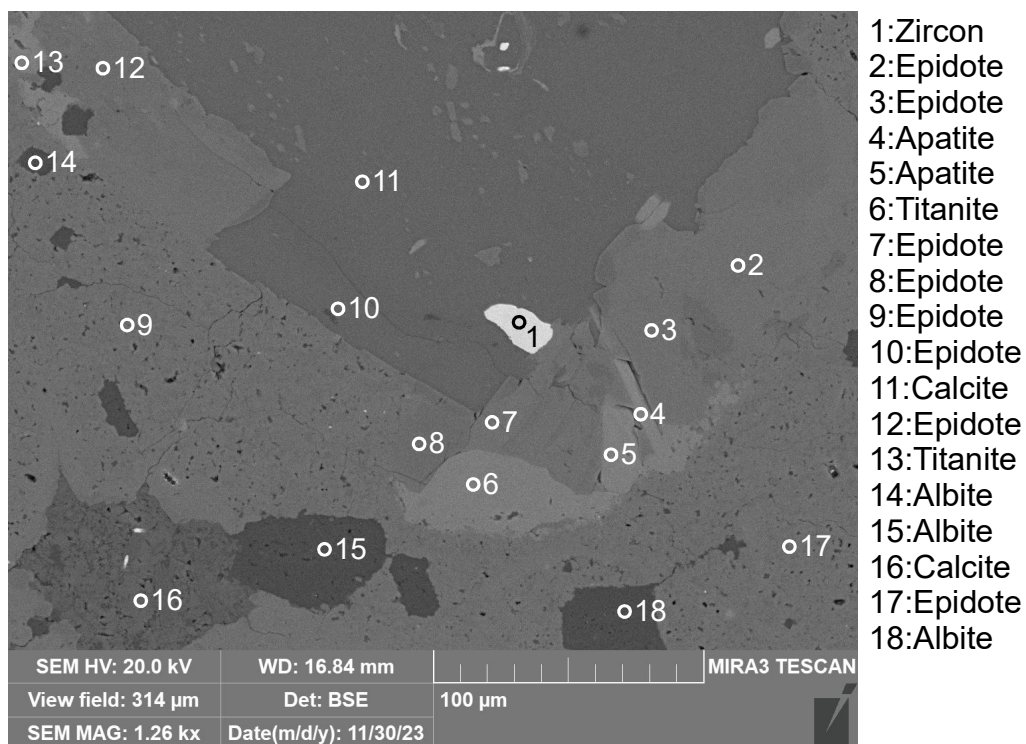

Figure S-1.8: Sample 8174 (SEM) site 7.

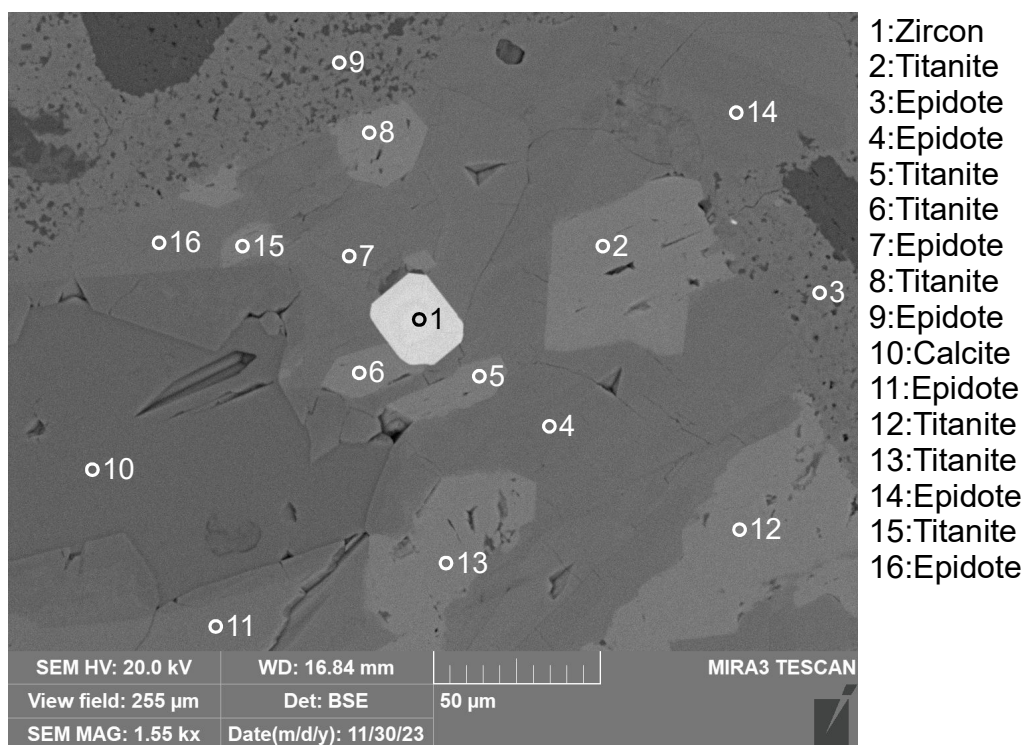

Figure S-1.9: Sample 8174 (SEM) site 8.

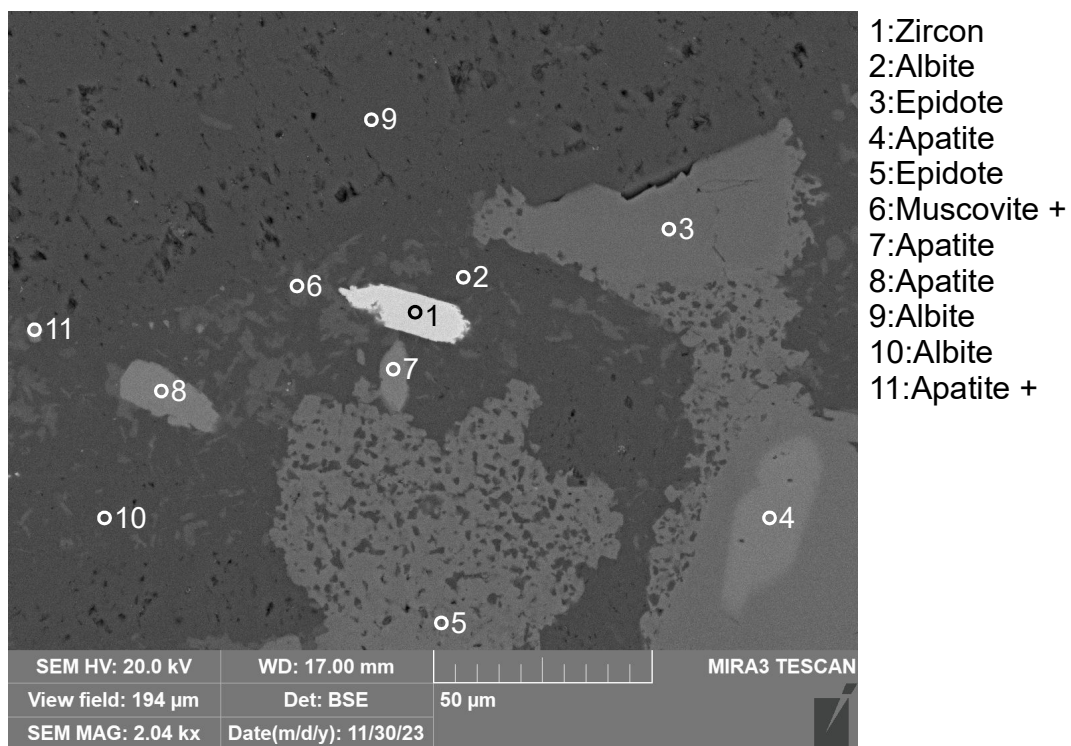

Figure S-1.10: Sample 8174 (SEM) site 9.
